# Supplementary material for: Structural Analysis of 3,5-Bistrifluoromethylhydrocinnamic Acid
Source: MDPI journal article supplement (doi:10.3390/cryst14040342), 2024-04-03
Supplement: s1 [file s1]

# Structural Analysis of 3,5-Bistrifluoromethylhydrocinnamic Acid

Piotr F. J. Lipiński <sup>1,\*</sup> and Krzysztof Łyczko <sup>2,\*</sup>

<sup>1</sup> Department of Neuropeptides, Mossakowski Medical Research Institute Polish Academy of Sciences, Pawińskiego 5, 02-106 Warsaw, Poland

<sup>2</sup> Institute of Nuclear Chemistry and Technology, Dorodna 16, 03-195 Warsaw, Poland

\* Correspondence: plipinski@imdik.pan.pl (P.F.J.L.); k.lyczko@ichtj.waw.pl (K.Ł.)

**Table S1.** Geometric and energetic parameters for the conformers of the unsubstituted hydrocinnamic acid and 3,5-bis-trifluoromethylhydrocinnamic acid (B3LYP/aug-cc-pvDZ level, gas-phase, with Grimme D3 correction for dispersion).

| hydrocinnamic acid |                          |                        |                            |            |            | 3,5-bistrifluoromethylhydrocinnamic acid |                          |                        |                            |            |            |
|--------------------|--------------------------|------------------------|----------------------------|------------|------------|------------------------------------------|--------------------------|------------------------|----------------------------|------------|------------|
|                    |                          |                        | Side-chain dihedral angles |            |            |                                          |                          |                        | Side-chain dihedral angles |            |            |
|                    |                          | $\Delta G$<br>[kJ/mol] | $\theta_1$                 | $\theta_2$ | $\theta_3$ |                                          |                          | $\Delta G$<br>[kJ/mol] | $\theta_1$                 | $\theta_2$ | $\theta_3$ |
| 1                  | trans-1<br>(c,ap,sp)     | 0.0                    | -89                        | 180        | 0          | 1                                        | trans-1<br>(c,ap,sp)     | 0.0                    | -89                        | 180        | -47        |
| 2                  | gauche-1<br>(c,sc,sp)    | 2.5                    | -87                        | -73        | -24        | 4                                        | gauche-1<br>(c,sc,sp)    | 3.1                    | -86                        | -72        | -64        |
| 3                  | trans-2<br>(c,ap,c)      | 3.2                    | -90                        | -179       | 99         | 3                                        | trans-2<br>(c,ap,c)      | 3.9                    | -91                        | -179       | 104        |
| 4                  | trans-flat<br>(sp,ap,sp) | 5.8                    | 180                        | 180        | 0          | 2                                        | trans-flat<br>(sp,ap,sp) | 7.6                    | 180                        | 180        | -47        |
| 5                  | gauche-2<br>(c,sc,ac)    | 5.8                    | -81                        | -62        | 131        | 5                                        | gauche-2<br>(c,sc,ac)    | 7.6                    | -82                        | -60        | 132        |

## A comment on GD3-corrected calculations:

When Grimme D3 correction for dispersion correction is applied to the calculations in the gas phase, the order of conformers of the hydrocinnamic acid changes. The  $\Delta G$  between **gauche-1** and **trans-flat** is 3.4 kJ/mol.

In 3,5-bistrifluoromethylhydrocinnamic acid, the order of conformers with the D3 correction applied is just like in the calculations without this correction.  $\Delta G$  between **gauche-1** and **trans-flat** is 4.4 kJ/mol. This is qualitatively consistent with the gas-phase, uncorrected calculations – **gauche-1** stabilization increases with 3,5-CF<sub>3</sub>-substitution.

**Table S2.** Geometric and energetic parameters for the conformers of the unsubstituted hydrocinnamic acid and 3,5-bis-trifluoromethylhydrocinnamic acid (B3LYP/aug-cc-pvDZ level, with PCM solvent [water] model).

| hydrocinnamic acid |                                   |                        |                            |            |            | 3,5-bis(trifluoromethyl)hydrocinnamic acid |                                   |                        |                            |            |            |
|--------------------|-----------------------------------|------------------------|----------------------------|------------|------------|--------------------------------------------|-----------------------------------|------------------------|----------------------------|------------|------------|
|                    |                                   |                        | Side-chain dihedral angles |            |            |                                            |                                   |                        | Side-chain dihedral angles |            |            |
|                    |                                   | $\Delta G$<br>[kJ/mol] | $\theta_1$                 | $\theta_2$ | $\theta_3$ |                                            |                                   | $\Delta G$<br>[kJ/mol] | $\theta_1$                 | $\theta_2$ | $\theta_3$ |
| 1                  | trans-1<br>( <i>c,ap,sp</i> )     | 0.0                    | -89                        | 180        | 0          | 1                                          | trans-1<br>( <i>c,ap,sp</i> )     | 0.0                    | -89                        | 180        | -47        |
| 2                  | trans-2<br>( <i>c,ap,c</i> )      | 3.4                    | -90                        | -179       | 98         | 2                                          | trans-2<br>( <i>c,ap,c</i> )      | 1.9                    | -90                        | -179       | 107        |
| 3                  | gauche-1<br>( <i>c,sc,sp</i> )    | 4.3                    | -87                        | -73        | -24        | 3                                          | gauche-1<br>( <i>c,sc,sp</i> )    | 3.8                    | -76                        | -71        | -64        |
| 4                  | trans-flat<br>( <i>sp,ap,sp</i> ) | 4.5                    | 180                        | 180        | 0          | 4                                          | trans-flat<br>( <i>sp,ap,sp</i> ) | 5.6                    | 180                        | 180        | -48        |
| 5                  | gauche-2<br>( <i>c,sc,ac</i> )    | 5.8                    | -79                        | -63        | 121        | 5                                          | gauche-2<br>( <i>c,sc,ac</i> )    | 6.6                    | -76                        | -62        | 131        |

**A comment on calculations in water (with PCM solvent model).**

First of all, it is to be noted, that the calculations were done on unionized acids, while pKa's for these analogues are to be expected at around 4.5-5. Therefore, they are applicable to low pH situation.

In the unsubstituted hydrocinnamic acid, the order of conformers is changed compared to the gas phase calculations. The **gauche-1** and **trans-flat** conformers are almost equinenergetic ( $\Delta G=0.2$  kJ/mol).

In the substituted analogue, again the order of conformers is different than in the gas phase. The  $\Delta G$  between **gauche-1** and **trans-flat** significantly increases ( $\Delta G = 2.3$  kJ/mol).

This is analogous to the gas phase results, in which 3,5-bisCF<sub>3</sub> substitution increases the population of **gauche-1** conformers.
