# Supplementary material for: Structural Analysis of 3,5-Bistrifluoromethylhydrocinnamic Acid
Source: MDPI journal article supplement (doi:10.3390/cryst14040342), 2024-04-03
Supplement: s1 [file s1]

Archive with 1 entries (1 files):
- crystals-2925901-supplementary.pdf
